# Supplementary material
Source: publisher site journal article supplement (http://www.kjim.org/upload/media/kjim-2018-055-suppl1.pdf)
Supplement: Supplementary file 1 [file kjim-2018-055-suppl1.pdf]

**Supplementary Table 1. Functional dysphagia scale using videofluoroscopic swallowing study in stroke patients**

| Factor                                     | Coded value | Score |
|--------------------------------------------|-------------|-------|
| Lip closure                                | Intact      | 0     |
|                                            | Inadequate  | 5     |
|                                            | None        | 10    |
| Bolus formation                            | Intact      | 0     |
|                                            | Inadequate  | 3     |
|                                            | None        | 6     |
| Residue in oral cavity                     | None        | 0     |
|                                            | ≤ 10%       | 2     |
|                                            | 10%–50%     | 4     |
|                                            | ≥ 50%       | 6     |
| Oral transit time                          | ≤ 1.5 sec   | 0     |
|                                            | ≥ 1.5 sec   | 6     |
| Triggering of pharyngeal swallow           | Normal      | 0     |
|                                            | Delayed     | 10    |
| Laryngeal elevation and epiglottic closure | Normal      | 0     |
|                                            | Reduced     | 12    |
| Nasal penetration                          | None        | 0     |
|                                            | ≤ 10%       | 4     |
|                                            | 10%–50%     | 8     |
|                                            | ≥ 50%       | 12    |
| Residue in valleculae                      | None        | 0     |
|                                            | ≤ 10%       | 4     |
|                                            | 10%–50%     | 8     |
|                                            | ≥ 50%       | 12    |
| Residue in pyriform sinuses                | None        | 0     |
|                                            | ≤ 10%       | 4     |
|                                            | 10%–50%     | 8     |
|                                            | ≥ 50%       | 12    |
| Coating of pharyngeal wall after swallow   | No          | 0     |
|                                            | Yes         | 10    |
| Pharyngeal transit time                    | ≤ 1.0 sec   | 0     |
|                                            | ≥ 1.0 sec   | 4     |
| Total                                      |             | 100   |
